# Supplementary material
Source: PubMed Central journal article supplement (PMC4088996)

# Figure S2. Analysis of spleen and lung immune cell populations following MG1 i.v. administration.

a.

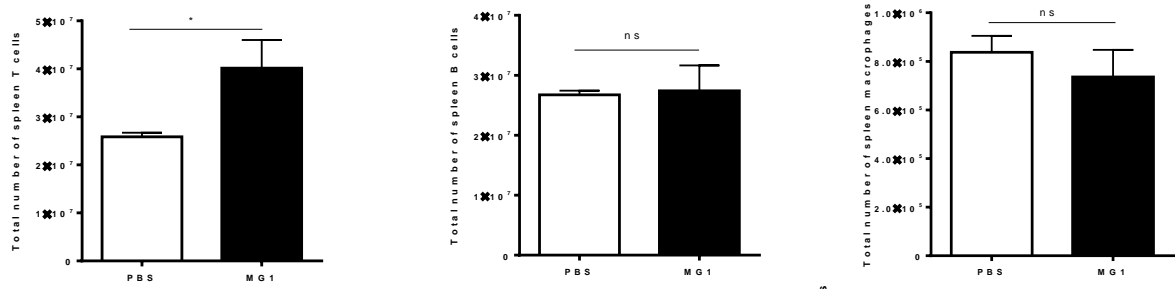

b.

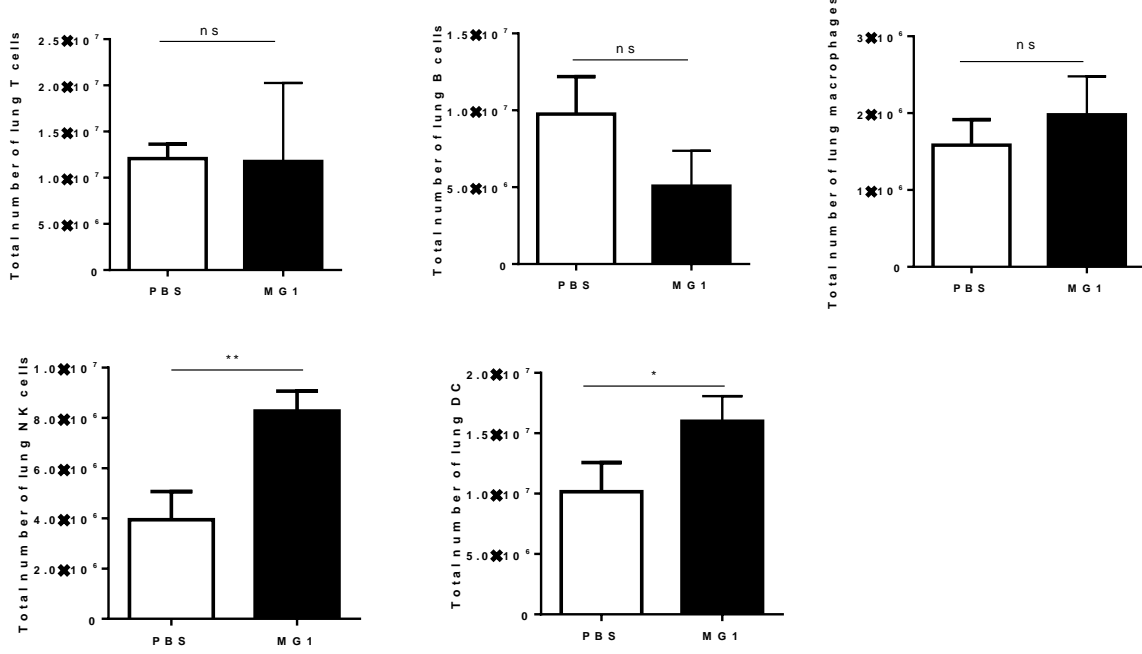

c.

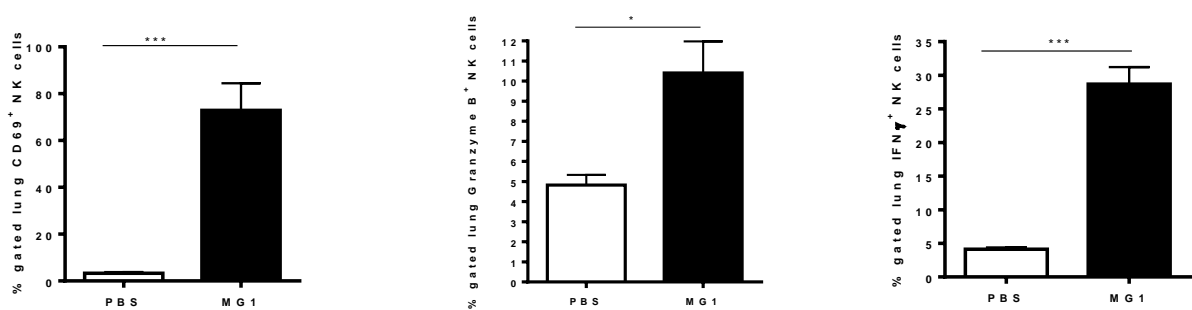

d.

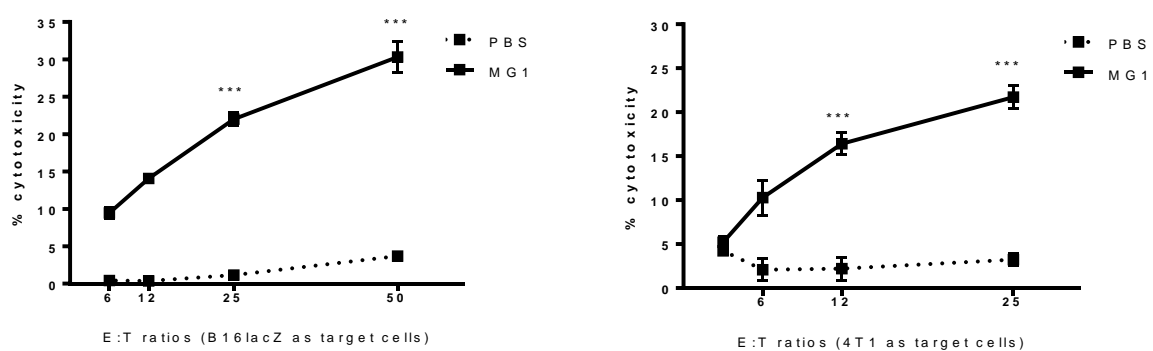

Supplement: mt201460x2.pdf [file mt201460x2.pdf]
