# Supplementary material
Source: PubMed Central journal article supplement (PMC4088996)

**Figure S1. *In vitro* and *in vivo* infection of MG1 and confirmation of UV inactivated MG1.**

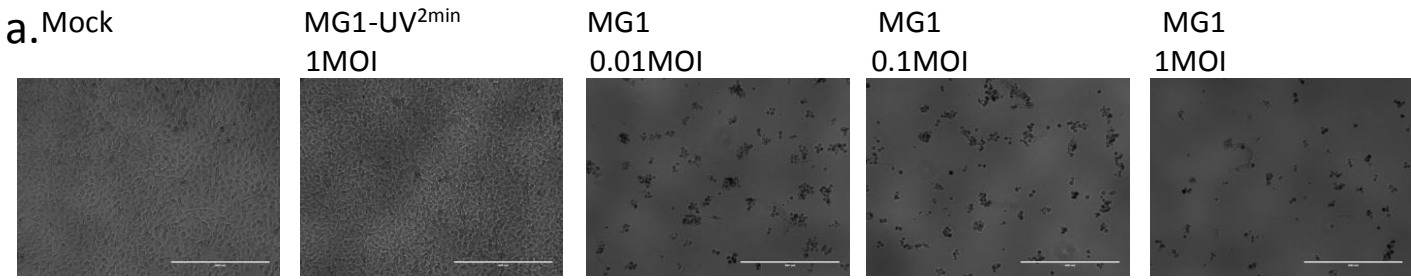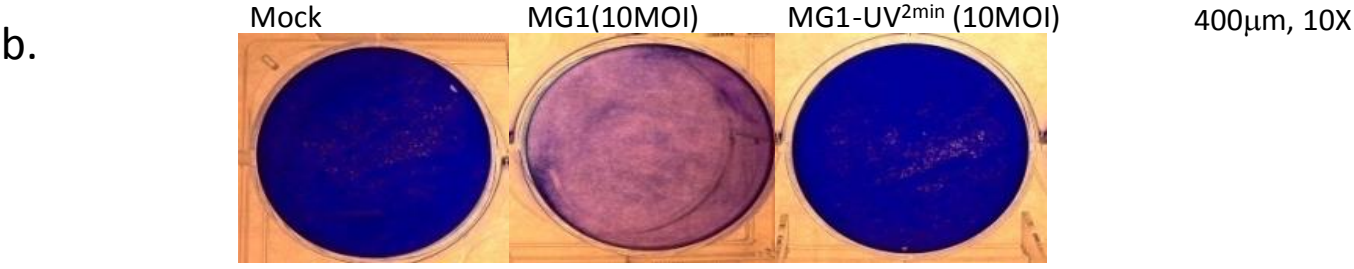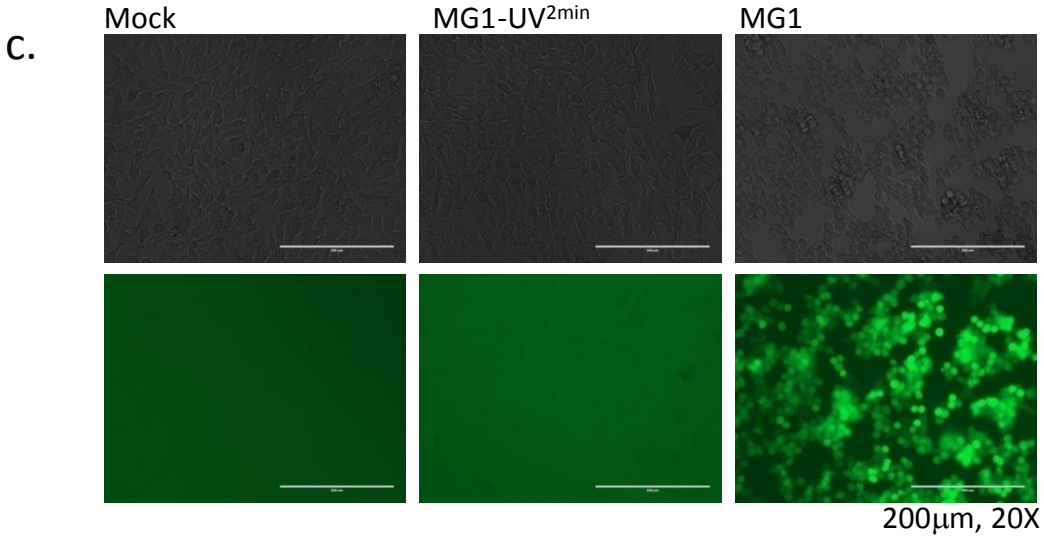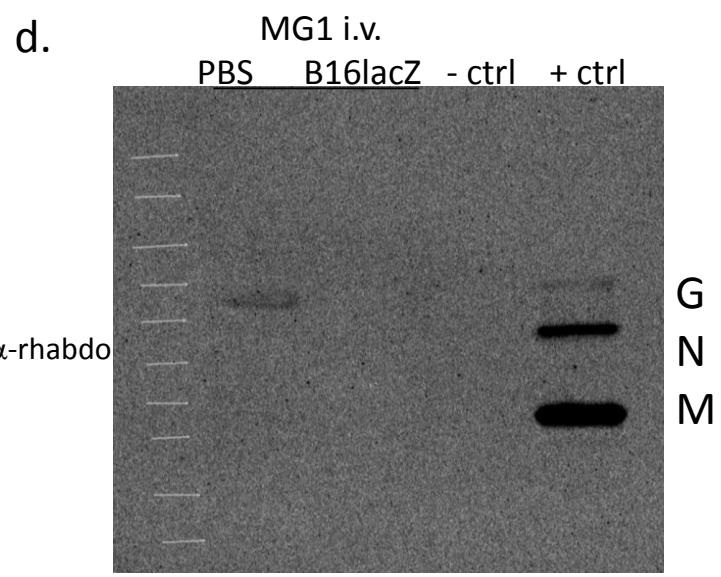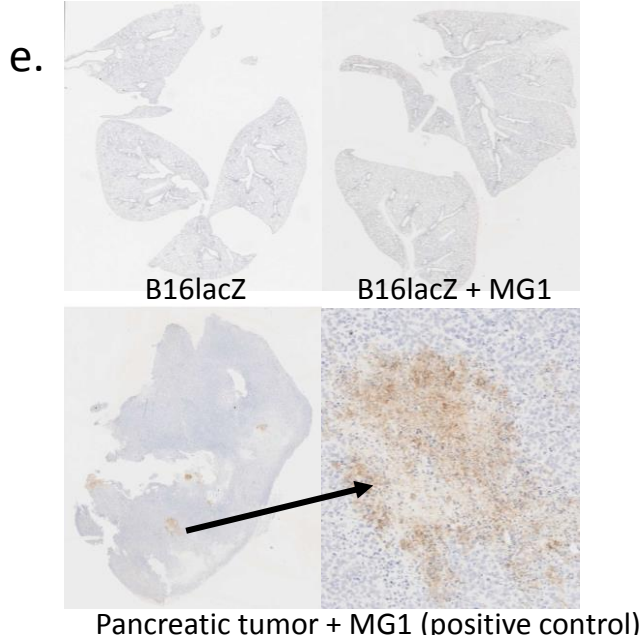

Supplement: mt201460x1.pdf [file mt201460x1.pdf]

**Figure S3. MG1-Gless: a single cycle replication virus.**

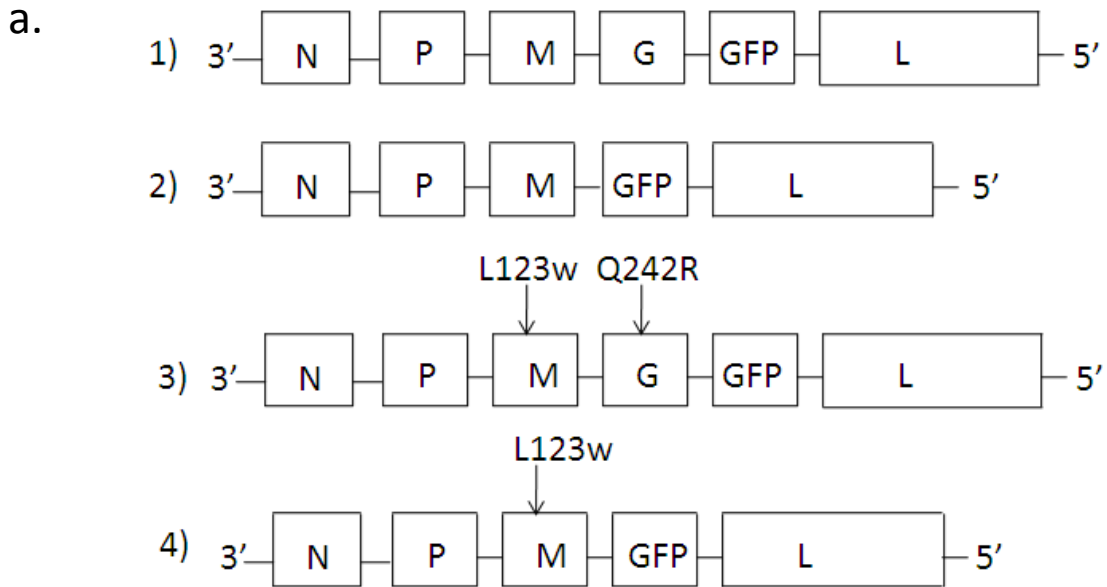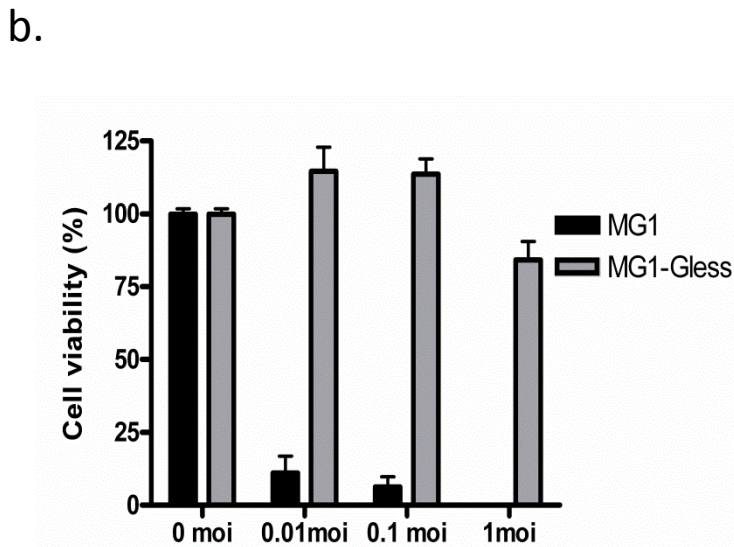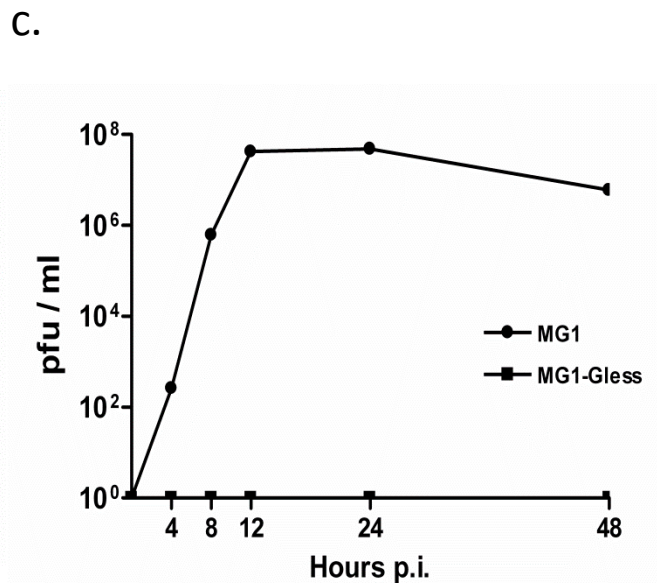

Supplement: mt201460x3.pdf [file mt201460x3.pdf]
